# Supplementary material
Source: Springer Nature journal article supplement (https://www.springermedizin.de/resource/supplementary/12891_2008_576_MOESM1_ESM.pdf/9511374)
Supplement: MOESM1 [file 9511374]

| Test                                                                                                                                                                                            | Correct                                                                                                                                                                                                                               | Not correct                                                                                                                                                                                   |
|-------------------------------------------------------------------------------------------------------------------------------------------------------------------------------------------------|---------------------------------------------------------------------------------------------------------------------------------------------------------------------------------------------------------------------------------------|-----------------------------------------------------------------------------------------------------------------------------------------------------------------------------------------------|
| <p><b>Test 1. "Waiters bow":</b><br/>Flexion of the hips in upright standing without movement (flexion) of the low back</p>                                                                     | <p>Forward bending of the hips without movement of the low back (50-70° Flexion hips).</p>                                                           | <p>Angle hip Flexion without low back movement less than 50° or Flexion occurring in the low back.</p>      |
| <p><b>Test 2. Pelvic tilt</b><br/>Dorsal tilt of pelvis actively in upright standing.</p>                                                                                                       | <p>Actively in upright standing; keeping thoracic spine in neutral, lumbar spine moves towards Flexion.</p>                                          | <p>Pelvis does not tilt or low back moves towards Extension or compensatory Flexion in thoracic spine.</p>  |
| <p><b>Test 3. One leg stance:</b><br/>From normal standing to one leg stance: measurement of lateral movement of the belly button. (Position: feet one third of trochanter distance apart).</p> | <p>The distance of the transfer is symmetrical right and left. Not more than 2 cm difference between sides.</p>                                    | <p>Lateral transfer of belly button more than 10 cm. Difference between sides more than 2 cm.</p>         |
| <p><b>Test 4. Sitting knee extension.</b><br/>Upright sitting with neutral lumbar lordosis; extension of the knee without movement (flexion) of low back</p>                                    | <p>Upright sitting with neutral lumbar lordosis; extension of the knee without movement of low back (30-50° Extension of the knee is normal).</p>  | <p>Low back is moving in flexion. Patient is not aware of the movement of the back.</p>                   |
